# Supplementary material for: The Anticancer Agent 3,3'-Diindolylmethane Inhibits Multispecies Biofilm Formation by Acne-Causing Bacteria and Candida albicans
Source: PubMed Central journal article supplement (PMC8809333; doi:10.1128/spectrum.02056-21), 2022-02-02
Supplement: spectrum02056-21_supp_1_seq14.pdf [file spectrum02056-21_supp_1_seq14.pdf]

## Supplementary materials

**Table S1. qRT-PCR primer sequences used for *C. acnes*.**

| <b>Gene</b>            | <b>Description</b>                       | <b>Primer</b>                                                                            |
|------------------------|------------------------------------------|------------------------------------------------------------------------------------------|
| <b>PPA1761</b>         | Lipase                                   | Forward 5'-CCT CAA GGT GTC TGG TCA TC-3'<br>Reverse 5'-GAC TTC GTC GTT TTT CCA GA-3'     |
| <b>PPA1796</b>         | Lipase                                   | Forward 5'-CTC AAG GTT CGT GAA CGA GT-3'<br>Reverse 5'-GCC ATA GAG CTC CTT GTT GA-3'     |
| <b>PPA2105</b>         | Lipase                                   | Forward 5'-GAT TTC CTT AGC ACG TGG AG-3'<br>Reverse 5'-GAT GAC GGT GTA GGC GAT AC-3'     |
| <b>PPA380</b>          | Hyaluronate lyase                        | Forward 5'-CGC TCT GAA GGA TTC GTC-3'<br>Reverse 5'-GTC GTG CAG GAT ACA CAT GA-3'        |
| <b><i>hly</i></b>      | Hyaluronate lyase                        | Forward 5'-CAA CAT CGC CGT GTT TAT TG-3'<br>Reverse 5'-CCC ATG ACG ACG TAG AGG AT-3'     |
| <b>PPA0149</b>         | Glycosyltransferase                      | Forward 5'-AGT ACA TGG CTT CCC GAG TG-3'<br>Reverse 5'-CTT GGG ACT CGA AGT TGA GC-3'     |
| <b><i>btuR</i></b>     | Cobinamide/cobalamin adenosyltransferase | Forward 5'-GGA AGA TGC TCT TCG GGC GCT-3'<br>Reverse 5'-GCC TCA GGG TTC TCC GCA GC-3'    |
| <b><i>cbiL</i></b>     | Precorrin-2 C(20)-methyltransferase      | Forward 5'-GCG CGA GGC AGA CGT GAT CC-3'<br>Reverse 5'-GAC ACC GGA CCT CTC CCG CA-3'     |
| <b><i>roxP</i></b>     | Radical oxygenase                        | Forward 5'-GCA TCT AGC CCT CTC ACC AT-3'<br>Reverse 5'-CTG AGA GTC CGG TAG GTG GT-3'     |
| <b><i>tly</i></b>      | Lysis of red blood cells                 | Forward 5'-CAG GAC GTG ATG GCA ATG CGA-3'<br>Reverse 5'-TCG TTC ACA AGA CCA CAG TAG C-3' |
| <b>PPA0349</b>         | Polysaccharide capsule biosynthesis      | Forward 5'-CTT CTT CGT CGA CCA GTT CC-3'<br>Reverse 5'-TCA GCT GTC TCG TCA ACA CC-3'     |
| <b><i>16s rRNA</i></b> | 16S ribosomal RNA (House keeping gene)   | Forward 5'-GGG GCT TAA CCC TGA GCG TGC-3'<br>Reverse 5'-TTC GCT CCC CAC GCT TTC GC-3'    |

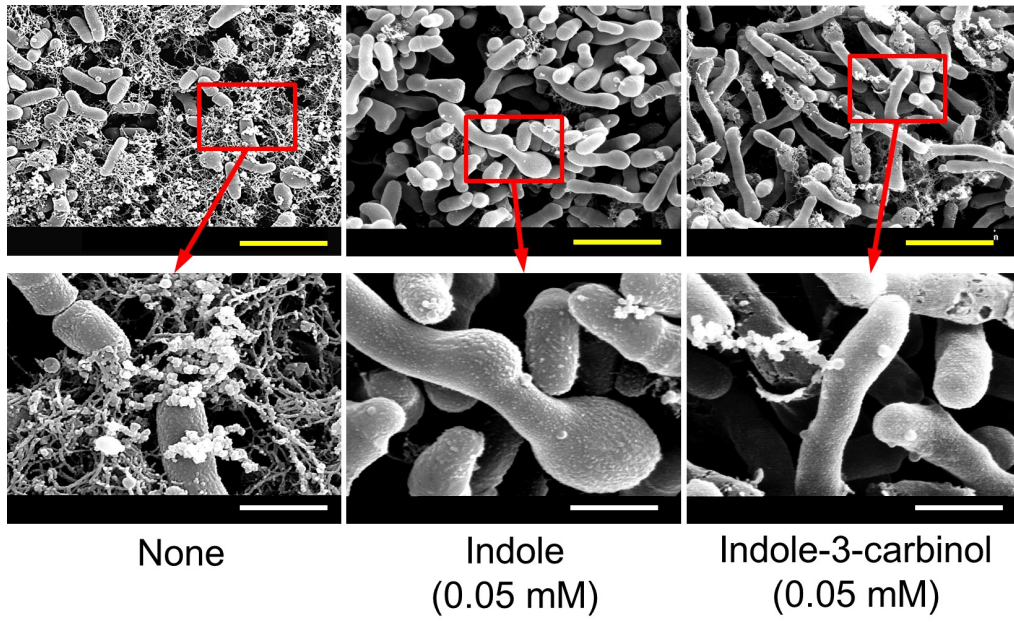

**Fig. S1. SEM images of *C. acnes* biofilms formed in the presence or absence of indole and indole-3-carbinol. Yellow and white scale bars represent 3  $\mu\text{m}$  and 750 nm, respectively.**

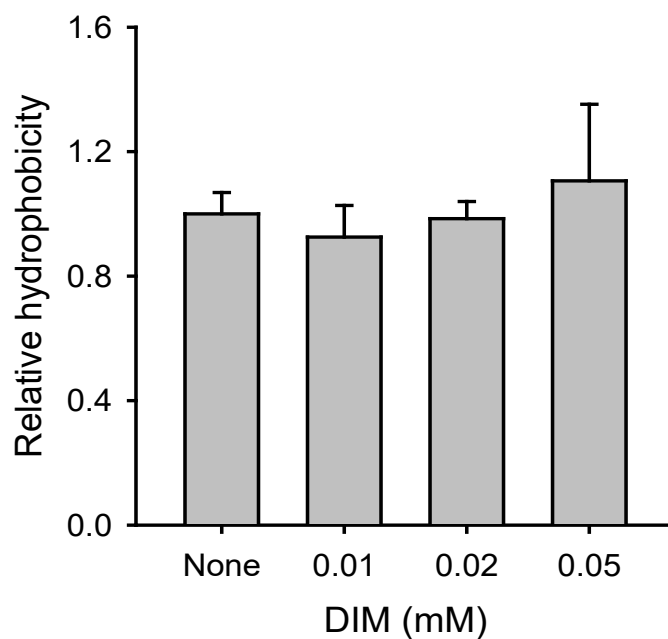

**Fig. S2.** Effect of DIM on the hydrophobicity of *C. acnes*. The cell surface hydrophobicity of *C. acnes* with or without individual DIM (0.01, 0.02 and 0.05 mM). *C. acnes* was cultured with or without DIM for 6 days at 37°C under the anaerobic condition. After incubation, cell cultures were prepared in sterile PBS at an OD<sub>600</sub> of ~ 0.5 by a proper dilution and same volume of toluene was added to 3 ml aliquots of cell suspensions and vortexed for 90 s. After vigorous mixing, the toluene phase was completely separated by incubation at room temperature for 10 h. The OD<sub>600</sub> values of aqueous phases were measured and cell surface hydrophobicity was quantified.
